1 Co-localization of Conditional eQTL and GWAS Signatures in Schizophrenia

2 Amanda Dobbyn<sup>1,2</sup>, Laura M. Huckins<sup>1,2</sup>, James Boocock<sup>3</sup>, Laura G. Sloofman<sup>1</sup>,  
3 Benjamin S. Glicksberg<sup>2,4,5</sup>, Claudia Giambartolomei<sup>3,6</sup>, Gabriel Hoffman<sup>2,4</sup>,  
4 Thanneer Perumal<sup>7</sup>, Kiran Girdhar<sup>1,2</sup>, Yan Jiang<sup>1,8</sup>, Douglas M. Ruderfer<sup>9</sup>, Robin  
5 S. Kramer<sup>10</sup>, Dalila Pinto<sup>4,8,11,12</sup>, the CommonMind Consortium, Schahram  
6 Akbarian<sup>1,8</sup>, Panos Roussos<sup>1,4,8</sup>, Enrico Domenici<sup>13</sup>, Bernie Devlin<sup>14</sup>, Pamela  
7 Sklar<sup>1,2,4,8</sup>, Eli A. Stahl<sup>1,4,\*‡</sup> and Solveig K. Sieberts<sup>7,\*\*‡</sup>

8

- 9 1) Division of Psychiatric Genomics, Department of Psychiatry, Icahn School of  
10 Medicine at Mount Sinai, New York, NY 10029, USA  
11 2) Department of Genetics and Genomic Sciences, Icahn School of Medicine at  
12 Mount Sinai, New York, NY 10029, USA  
13 3) Department of Human Genetics, David Geffen School of Medicine, University  
14 of California Los Angeles, Los Angeles, CA 90024, USA  
15 4) Institute for Genomics and Multiscale Biology, Icahn School of Medicine at  
16 Mount Sinai, New York, NY 10029, USA  
17 5) Institute for Next Generation Healthcare, Mount Sinai Health System, Icahn  
18 School of Medicine at Mount Sinai, New York, NY 10029, USA  
19 6) Department of Pathology and Laboratory Medicine, University of California Los  
20 Angeles, Los Angeles, CA 90095, USA  
21 7) Systems Biology, Sage Bionetworks, Seattle, WA 98109, USA  
22 8) Friedman Brain Institute, Icahn School of Medicine at Mount Sinai, New York,  
23 NY 10029, USA  
24 9) Division of Genetic Medicine, Department of Medicine, Psychiatry and  
25 Biomedical Informatics, Vanderbilt Genetics Institute, Vanderbilt University  
26 Medical Center, Nashville, TN 37235, USA  
27 10) Human Brain Collection Core, National Institute of Mental Health, Bethesda,  
28 MD 20892, USA  
29 11) Department of Psychiatry and Seaver Autism Center for Research and  
30 Treatment, Icahn School of Medicine at Mount Sinai, New York, NY 10029, USA  
31 12) Mindich Child Health and Development Institute, Icahn School of Medicine at  
32 Mount Sinai, New York, NY 10029, USA  
33 13) Laboratory of Neurogenomic Biomarkers, Centre for Integrative Biology  
34 (CIBIO), University of Trento, Trento, Italy  
35 14) Department of Psychiatry, University of Pittsburgh, Pittsburgh, PA 15213,  
36 USA

37

38 ‡ These authors contributed equally to this work

39

40

---

\* eli.stahl@mssm.edu

\*\* solly.sieberts@sagebase.org

41 ABSTRACT

42

43 Causal genes and variants within genome-wide association study (GWAS) loci  
44 can be identified by integrating GWAS statistics with expression quantitative trait  
45 loci (eQTL) and determining which SNPs underlie both GWAS and eQTL signals.  
46 Most analyses, however, consider only the marginal eQTL signal, rather than  
47 dissecting this signal into multiple independent eQTL for each gene. Here we  
48 show that analyzing conditional eQTL signatures, which could be important under  
49 specific cellular or temporal contexts, leads to improved fine mapping of GWAS  
50 associations. Using genotypes and gene expression levels from post-mortem  
51 human brain samples (N=467) reported by the CommonMind Consortium (CMC),  
52 we find that conditional eQTL are widespread; 63% of genes with primary eQTL  
53 also have conditional eQTL. In addition, genomic features associated with  
54 conditional eQTL are consistent with context specific (i.e. tissue, cell type, or  
55 developmental time point specific) regulation of gene expression. Integrating the  
56 Psychiatric Genomics Consortium schizophrenia (SCZ) GWAS and CMC  
57 conditional eQTL data reveals forty loci with strong evidence for co-localization  
58 (posterior probability >0.8), including six loci with co-localization of conditional  
59 eQTL. Our co-localization analyses support previously reported genes and  
60 identify novel genes for schizophrenia risk, and provide specific hypotheses for  
61 their functional follow-up.

62

63

64 INTRODUCTION

65

66 Significant advances in understanding the genetic architecture of schizophrenia  
67 have occurred over the last ten years. However, for common variants identified in  
68 genome-wide association studies (GWAS), the success in locus identification is  
69 not yet matched by an understanding of their underlying basic mechanism or  
70 effect on pathophysiology. Expression quantitative trait loci (eQTL), which are  
71 responsible for a significant proportion of variation in gene expression, could  
72 serve as a link between the numerous non-coding genetic associations that have  
73 been identified in GWAS and susceptibility to common diseases directly through  
74 their association with gene expression regulation.<sup>1-4</sup> Indeed, results from eQTL  
75 mapping studies have been successfully utilized to identify genes and causal  
76 variants from GWAS for various complex phenotypes, including asthma, body  
77 mass index, celiac disease, and Crohn's disease.<sup>5-8</sup>

78

79 Studies integrating eQTL and GWAS data have almost exclusively used marginal  
80 association statistics which typically represent the primary, or most significant,  
81 eQTL signal when assessing co-localization with GWAS, ignoring other SNPs  
82 that affect expression independently of the primary eQTL for a given gene.  
83 However, recent findings indicating that conditionally independent eQTL are  
84 widespread<sup>9-11</sup> motivate examination of the extent to which considering  
85 conditional eQTL may provide additional power to identify likely causal genes in a  
86 GWAS locus. Recent reports provide evidence that conditional eQTL are less

87 frequently shared across tissues than primary eQTL<sup>9</sup> and, like tissue and cell  
88 type specific eQTL, are often found more distally to the genes they regulate.<sup>9; 12;</sup>  
89 <sup>13</sup> These lines of evidence suggest that conditionally independent eQTL may  
90 contribute to tissue- or other context-specific gene regulation (e.g. specific to a  
91 particular cell type, developmental stage, or stimulation condition).

92  
93 Here, we leveraged genotype and dorsolateral prefrontal cortex (DLPFC)  
94 expression data provided by the CommonMind Consortium (CMC) to elucidate  
95 the role of conditional eQTL in the etiology of schizophrenia (SCZ). Currently  
96 comprising the largest existing postmortem brain genomic resource at nearly 600  
97 samples, the CMC is generating and making publicly available an unprecedented  
98 array of functional genomic data, including gene expression (RNA-sequencing),  
99 histone modification (chromatin immunoprecipitation, ChIP-seq), and SNP  
100 genotypes, from individuals with psychiatric disorders as well as unaffected  
101 controls.<sup>14</sup> We utilized SNP dosage and RNA-sequencing (RNA-seq) data from  
102 the CMC to identify primary and conditionally independent eQTL. We then  
103 characterized the resulting eQTL on various genomic attributes including  
104 distance to transcription start site, and their genes' specificity across tissues, cell-  
105 types, and developmental periods. In addition, we quantified enrichment of  
106 primary and conditional eQTL in promoter and enhancer functional genomic  
107 elements inferred from epigenomic data. Finally, we isolated each independent  
108 eQTL signal by conducting a series of "all-but-one" conditional analyses for

109 genes with multiple independent eQTL, and assessed the overlap between all  
110 eQTL association signals and the SCZ GWAS signals.

111

## 112 MATERIAL AND METHODS

113

### 114 **CommonMind Consortium Data**

115

116 We used pre-QC'ed genotype and expression data made available from the  
117 CommonMind Consortium, and detailed information on quality control, data  
118 adjustment and normalization procedures can be found in Fromer et. al.<sup>14</sup> Briefly,  
119 samples were genotyped at 958,178 markers using the Illumina Infinium  
120 HumanOmniExpressExome array, and markers were removed on the basis of  
121 having no alternate alleles, having a genotyping call rate  $\leq 0.98$ , or a Hardy-  
122 Weinberg P-value  $< 5 \times 10^{-5}$ . After phasing and imputation using the 1000  
123 Genomes Phase 1 integrated reference then filtering out variants with INFO  $< 0.8$   
124 or MAF  $< 0.05$ , the total number of markers included in the analysis increased to  
125 approximately 6.4 million. Gene expression was assayed via RNA-seq using 100  
126 base pair paired end reads, and mapped to human Ensembl gene reference  
127 (v70) using TopHat version 2.0.9 and Bowtie version 2.1.0. After discarding  
128 genes with less than 1 CPM (counts per million) in at least 50% of the samples,  
129 RNA-seq data for a total of 16,423 Ensembl genes were considered for analysis.  
130 The expression data was voom-adjusted for both known covariates (RIN, library  
131 batch, institution, diagnosis, post-mortem interval, and sex) and surrogate

132 variable analysis (SVA) identified surrogate variables. After the removal of  
133 individuals that did not pass RNA sample QC (including but not limited to: having  
134 RIN < 5.5, having less than 50 million total reads or more than 5% of reads  
135 aligning to rRNA, having any discordance between genotyping and RNA-seq  
136 data, and having RNA outlier status or evidence for contamination), and retaining  
137 only genetically-identified European-ancestry individuals, a total of 467 samples  
138 were used for downstream analyses. These 467 individuals comprised 209 SCZ  
139 cases, 52 AFF (Bipolar, Major depressive disorder, or Mood disorder,  
140 unspecified) cases, and 206 controls.

141

#### 142 **eQTL Identification**

143

144 To identify primary and conditional cis-eQTL, we a conducted forward stepwise  
145 conditional analysis implemented in MatrixEQTL<sup>15</sup> using genotype data at 6.4  
146 million markers and RNA-seq data for 16,423 genes. For each gene with at least  
147 one cis-eQTL (gene  $\pm$  1 Mb) association at a 5% false discovery rate (FDR), the  
148 most significant SNP was added as a covariate in order to identify additional  
149 independent associations. This procedure was repeated iteratively until no further  
150 FDR significant eQTL were identified. We used a linear regression model,  
151 adjusting for diagnosis and five ancestry covariates inferred by GemTools.  
152 Following eQTL identification, only autosomal eQTL were retained for  
153 downstream analyses.

154

## 155 **Replication in Independent Datasets**

156

157 Replication was performed in HBCC microarray cohort (dbGaP ID phs000979,  
158 see Web Resources) and in the ROSMAP<sup>16</sup> RNA-seq cohort by fitting the  
159 stepwise regression models identified in the CMC data. For cases in which a  
160 marker was unavailable in the replication cohort, all models including that marker  
161 (i.e. for that eQTL and higher-order eQTL conditional on it, for a given gene)  
162 were omitted from replication.

163

164 Data from the HBCC cohort was QC'ed and normalized as described in Fromer  
165 et al.<sup>14</sup> DLPFC tissue was profiled on the Illumina HumanHT-12\_V4 Beadchips  
166 and normalized in an analogous manner to the CMC data. Genotypes were  
167 obtained using the HumanHap650Yv3 or Human1MDuov3 chips and imputed to  
168 1000 Genomes Phase 1. Replication of the eQTL models was performed on 279  
169 genetically inferred Caucasian samples (76 controls, 72 SCZ, 43 BP, 88 MDD)  
170 adjusting for diagnosis and five ancestry components.

171

172 ROSMAP data were obtained from the AMP-AD Knowledge Portal (see Web  
173 Resources). Quantile normalized FPKM expression values were adjusted for Age  
174 of Death, RIN, PMI, and hidden confounders from SVA, conditional on diagnosis.  
175 Only genes with FPKM > 0 in > 50 samples were considered in analyses. QC'ed  
176 genotypes were also obtained from the AMP-AD Knowledge Portal and imputed  
177 to the Haplotype Reference Consortium (v1.1)<sup>17</sup> reference panel via the Michigan

178 Imputation Server.<sup>18</sup> Only markers with imputation quality score  $R^2 \geq 0.7$  were  
179 considered in the replication analysis. GemTools was used to infer ancestry  
180 components as for CMC above. After QC, 494 samples were used for eQTL  
181 replication in a linear regression model that also adjusted for diagnosis  
182 (Alzheimer's disease, mild cognitive impairment, no cognitive impairment and  
183 other) and four ancestry components.

184

### 185 **Modeling Number of eQTL per Gene on Genomic Features**

186

187 We considered three genomic features (gene length, number of LD blocks in the  
188 cis-region, and genic constraint score) for our modeling analyses. Gene lengths  
189 were calculated using Ensembl gene locations. We obtained LD blocks from the  
190 LDetect Bitbucket site to tally the number of LD blocks overlapping each gene's  
191 cis-region (gene  $\pm$  1Mb). We obtained Loss-of-Function-based genic constraint  
192 scores from the Exome Aggregation Consortium (ExAC). A negative-binomial  
193 generalized linear regression model was used to model the number of eQTL per  
194 gene based on the above variables; results were qualitatively the same using  
195 linear regression of Box-Cox transformed eQTL numbers. Backward-forward  
196 stepwise regression using the full model with interaction terms for these three  
197 variables was used to determine the relationship between genomic conditions  
198 and eQTL number. These analyses were implemented in R.

199



200 Cis-heritability of gene expression was estimated using the same CMC data used  
201 for eQTL detection, using all markers in the cis-region using GCTA<sup>19</sup>, and SNP-  
202 heritability estimates were included in the modeling described above.

203

204 Tissue, cell type, and developmental time point specificity were measured using  
205 the expression specificity metric Tau.<sup>20; 21</sup> Tissue specificity for each gene was  
206 calculated using publicly available expression data for 53 tissues from the GTEx  
207 project<sup>22</sup> (release V6p). Expression for each tissue was summarized as the log<sub>2</sub>  
208 of the median expression plus one, and then used to calculate tissue specificity  
209 Tau. Cell type specificity for each gene was computed using publicly available  
210 single-cell RNA-sequencing expression data<sup>23</sup> generated from human cortex and  
211 hippocampus tissues. Raw expression counts for 285 cells comprising six major  
212 cell types of the brain were obtained from GEO (GSE67835) and counts data  
213 were library normalized to CPM. Expression for each cell type was then  
214 summarized as the log<sub>2</sub> of the mean expression plus one, and then used to  
215 compute cell type specificity Tau. Developmental time point specificity for each  
216 gene was calculated using publicly available DLPFC expression data for 27 time  
217 points, clustered into eight biologically relevant groups, from the BrainSpan atlas  
218 (see Web resources). Eight developmental periods<sup>24</sup> were defined as follows:  
219 early prenatal (8-12 pcw), early mid-prenatal (13-17 pcw), late mid-prenatal (19-  
220 24 pcw), late prenatal (25-37 pcw), infancy (4 mos - 1 yr), childhood (2 - 11 yr),  
221 adolescence (13 - 19 yr), and adulthood (21 yr +). Expression for each time point  
222 was summarized as the log<sub>2</sub> of the median expression plus one, and then used

223 to calculate developmental period specificity (Tau). Each Tau was added to the  
224 above modeling of eQTL number in turn, as well as all together.

225

## 226 **Enrichment Analyses**

227

228 We divided eQTL into separate subgroups by stepwise conditional order (first,  
229 second, third, and greater than third), and created sets of matched SNPs drawn  
230 from the SNPsnip database for each subgroup, matching on minor allele  
231 frequency, gene density (number of genes within 1Mb of the SNP), distance from  
232 SNP to TSS of the nearest gene, and LD (number of LD-partners within  $r^2 \geq 0.8$ ).

233 For each subgroup of eQTL, we performed a logistic regression of status as  
234 eQTL or matched SNP on overlap with functional annotation, including the four  
235 SNP matching parameters as covariates. Enrichment was taken as the  
236 regression coefficient estimate, interpretable as the log-odds ratio for being an  
237 eQTL given a functional annotation. Functional annotations tested included:  
238 DLPCF promoters and enhancers (TssA and Enh+EnhG, respectively, from the  
239 NIH Roadmap Epigenomics Project<sup>25</sup> ChromHMM<sup>26</sup> core 15-state model), Brain  
240 promoters and enhancers (union of all brain region TssA and Enh+EnhG,  
241 respectively, from the NIH Roadmap Epigenomics Project ChromHMM core 15-  
242 state model), and pre-frontal cortex (PFC) neuronal (NeuN+) and non-neuronal  
243 (NeuN-) nuclei H3K4me3 and H3K27ac ChIP-seq marks from the CMC. For each  
244 data source, Roadmap DLPCF, brain, CMC NeuN+, NeuN-, active promoter and

245 enhancer (or H3K4me3 and H3K27ac) annotation were tested for enrichment  
246 jointly.

247

## 248 **Conditional eQTL Analyses**

249

250 In order to isolate each conditionally independent cis-eQTL association, we  
251 carried out a series of “all-but-one” conditional analyses, implemented within  
252 MatrixEQTL<sup>15</sup>, for each gene possessing more than one independent eQTL. As  
253 these conditional eQTL signals were to be used to test for co-localization with the  
254 SCZ GWAS signals, we limited these analyses to those genes (346 in total) with  
255 eQTL overlapping GWAS loci. For each of these genes, we conducted an “all-  
256 but-one” analysis for each independent eQTL by regressing the given gene’s  
257 expression data on the dosage data, including all of the other independent eQTL  
258 for that gene as covariates in addition to diagnosis and five ancestry  
259 components. For example, three conditional analyses would be conducted for a  
260 gene with three independent eQTL: one analysis conditioning on the secondary  
261 and tertiary eQTL, one analysis conditioning on the primary and tertiary, and one  
262 analysis conditioning on the primary and secondary. In this manner we generated  
263 summary statistics for each independent eQTL in isolation, conditional on all of  
264 the other independent eQTL for that gene.

265

266

267

## 268 **Co-localization Analyses**

269

270 For our co-localization analyses, we used summary statistics and genomic  
271 intervals from the 2014 PGC SCZ GWAS.<sup>27</sup> We included 217 loci at a P-value  
272 threshold of  $1 \times 10^{-6}$  (omitting the complex MHC locus), defined these loci by their  
273 LD  $r^2 \geq 0.6$  with the lead SNP, and then merged overlapping loci. GWAS and  
274 eQTL signatures were qualitatively compared using P-P plots, rendered in R, and  
275 LocusZoom<sup>28</sup> plots.

276

277 We tested for co-localization using an updated version of COLOC<sup>29</sup> R functions,  
278 which we name COLOC2 (see Web Resources) which incorporates several  
279 improvements to the method. First, COLOC2 preprocesses data by aligning  
280 eQTL and GWAS summary statistics for each eQTL cis-region. Second, the  
281 COLOC2 model optionally incorporates changes implemented in gwas-pw<sup>30</sup>.  
282 Briefly, we implemented learning mixture proportions of five hypotheses ( $H_0$ , no  
283 association;  $H_1$ , GWAS association only;  $H_2$ , eQTL association only;  $H_3$ , both but  
284 not co-localized; and  $H_4$ , both and co-localized) from the data. COLOC2 uses  
285 these proportions as priors (or optionally, COLOC default or user specified priors)  
286 in the empirical Bayesian calculation of the posterior probability of co-localization  
287 for each locus (eQTL cis-region). COLOC2 averages per-SNP Wakefield  
288 asymptotic Bayes factors (WABF)<sup>31</sup> across three different values for the WABF  
289 prior variance term, 0.01, 0.1, and 0.5, and provides options for specifying

290 phenotypic variance, estimating it from case-control proportions, or estimating it  
291 from the data.

292

## 293 RESULTS

294

### 295 **Identification of eQTL**

296

297 Primary and conditional eQTL were identified using genotype and RNA-seq data  
298 from the CommonMind Consortium post-mortem DLPFC samples (467  
299 European-ancestry cases and controls).<sup>14</sup> We identified 16,273 conditional eQTL  
300 in addition to the 13,137 primary eQTL we previously reported<sup>14</sup> for a total of  
301 29,410 independent cis-eQTL for 15,817 autosomal genes. Of the genes tested,  
302 81% (12,813 genes) had at least one eQTL and 63% of these (51% of all genes)  
303 also had at least one conditional eQTL, with an average of 1.83 independent  
304 eQTL per gene (2.26 among those with at least one eQTL), and a maximum of  
305 16 eQTL (Figure 1). Conversely, when examining the distributions for the number  
306 of genes whose expression was affected by each eQTL (**Table S1**), the majority  
307 of eQTL were specific for a single gene, and only a small fraction of eQTL,  
308 1.47%, affected more than one gene, with a maximum of six genes affected by a  
309 single eQTL.

310

311 We tested conditional eQTL for replication in two independent data sets, the  
312 National Institute of Mental Health's Human Brain Collection Core (HBCC,

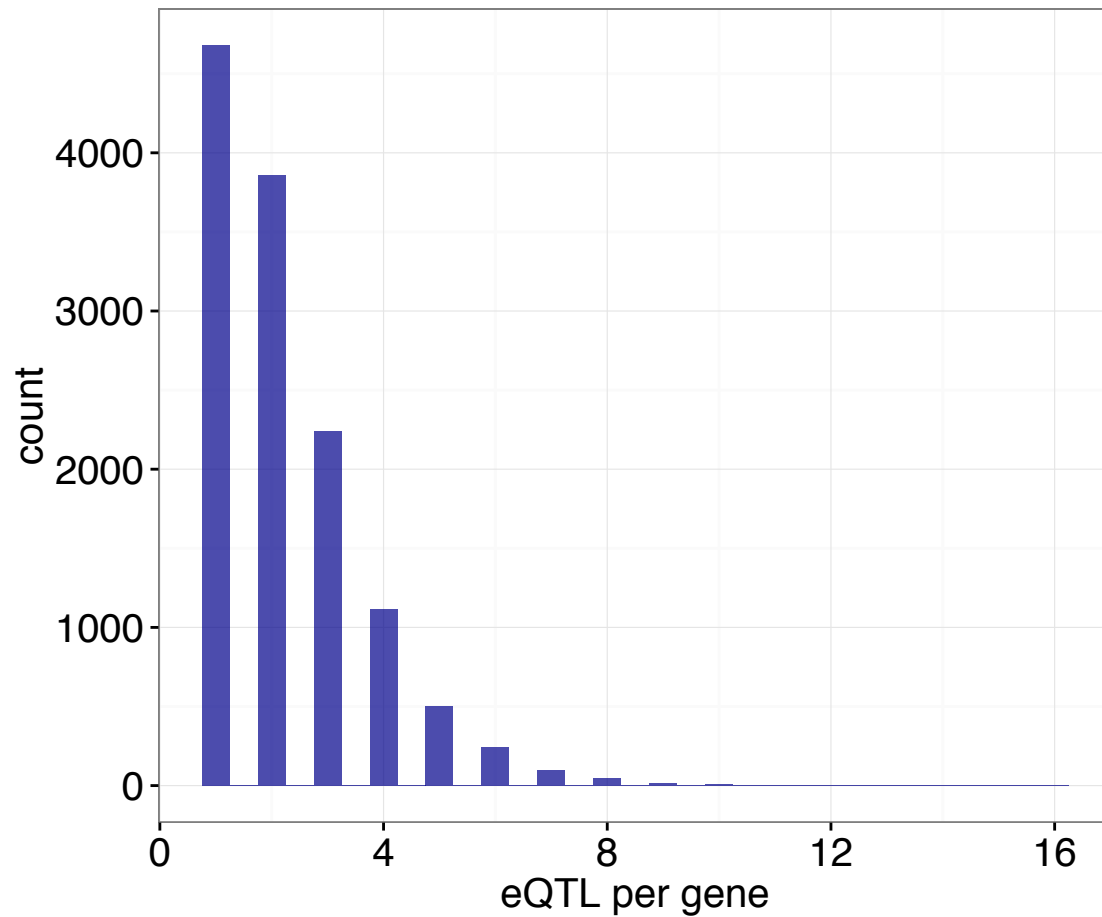

Figure 1. Distribution of the Number of Independent eQTL per Gene

Counts of the numbers of genes (y-axis) regulated by  $N$  ( $1 \leq N \leq 16$ ) independent eQTL (x-axis). Plotted are 28,895 cis-eQTL with  $FDR \leq 5\%$ , for 12,813 autosomal genes. For genes with eQTL, there are an average of 2.26 eQTL per gene and a maximum of 16 eQTL per gene.

313 N=279, microarray expression data) and the Religious Orders Study / Memory  
314 and Aging Project<sup>16</sup> (ROSMAP, N=494, RNA-seq expression). For each gene the  
315 same models were evaluated that were identified in forward-stepwise conditional  
316 analysis in the CMC data. We observed strong evidence of replication for both  
317 primary and conditional eQTL in the HBCC and ROSMAP post-mortem brain  
318 cohorts (**Table S2**). The estimated proportion of true associations ( $\pi_1$ ) in  
319 ROSMAP was 0.57 and 0.26 for primary and conditional eQTL, respectively; in  
320 HBCC  $\pi_1$  was 0.46 and 0.20 for primary and conditional eQTL. Thus replication  
321 was stronger for primary than for conditional eQTL, as expected given their  
322 stronger effect sizes. Replication rates were somewhat higher in the RNA-seq  
323 ROSMAP data than in HBCC.

324

### 325 **Genomic Characterization of Primary and Conditional eQTL**

326

327 According to prior results, eQTL that are shared across tissues and cell types  
328 tend to be located closer to transcription start sites (TSS) than context specific  
329 eQTL.<sup>9; 12; 13</sup> We therefore examined the relationship between primary or  
330 conditional eQTL status and distance to its gene's transcription start site. Primary  
331 eQTL fall closer to the TSS than conditional eQTL (Figure 2): primary eQTL  
332 occur at a median distance of 70.4 Kb from the TSS versus a median distance of  
333 302 Kb for conditional eQTL. This difference holds true even more proximally to  
334 TSS (**Figure S1**); 8.1 and 2.5 percent of primary and conditional eQTL,  
335 respectively, fall within three Kb of the TSS.

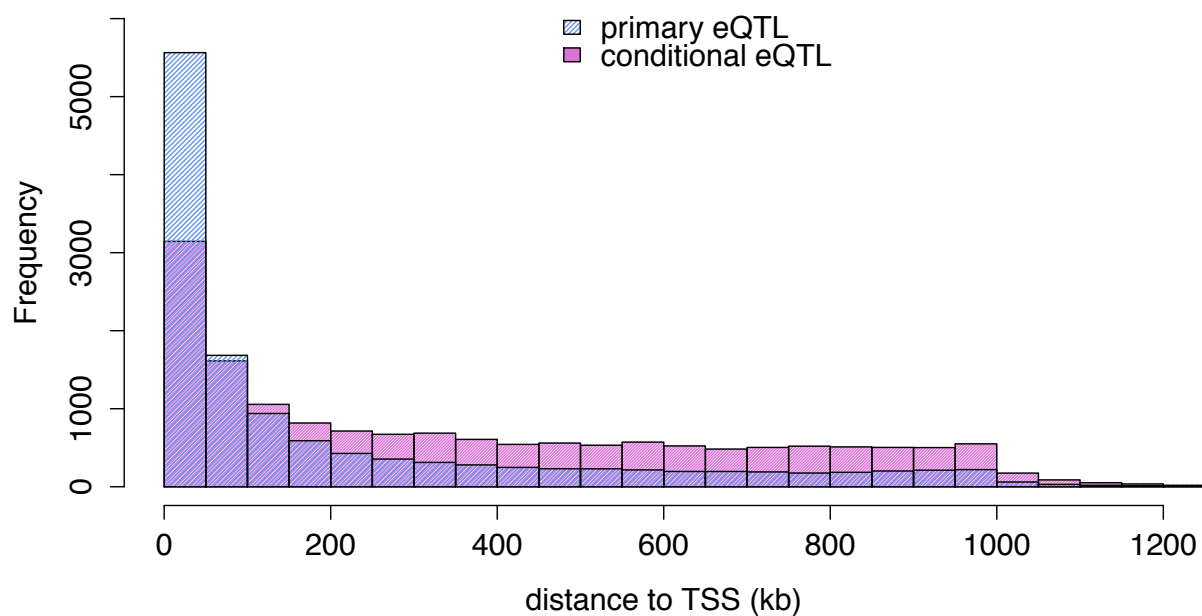

Figure 2. Distance from eQTL to transcription start site (TSS)

Overlapping histograms showing the numbers of eQTL (y-axis) occurring at increasing distances to TSS (x-axis), for primary eQTL (blue) and conditional eQTL (pink).



336

337 We next characterized the relationship between the number of independent  
338 eQTL per gene and three different genomic features: gene length, number of LD  
339 blocks<sup>32</sup> in the gene's cis-region ( $\pm 1$  Mb) and Exome Aggregation Consortium  
340 (ExAC) genic constraint score,<sup>33</sup> including possible interactions. The best  
341 multivariate model for eQTL number included gene length, number of LD blocks  
342 and genic constraint as predictors, as well as a gene length-LD blocks interaction  
343 (Table 1). The number of independent eQTL was positively correlated with gene  
344 length and number of LD blocks, and negatively correlated with genic constraint  
345 score (**Figure S2**).

346

347 We next examined the variance of gene expression explained by cis-region  
348 SNPs, or cis-SNP-heritability, estimated by linear mixed model variance  
349 component analysis<sup>19</sup> (**Figure S3**). We found a strong effect of estimated cis-  
350 heritability on number of independent eQTL (Table 1, **Figure S4**). In a joint model  
351 with cis-SNP-heritability, the main effects of gene length, number of LD blocks  
352 and genic constraint on eQTL number remained at least nominally significant.

353

354 Finally we addressed whether genes with conditional eQTL exhibit greater  
355 context specificity as measured by the robust expression specificity metric Tau.<sup>20</sup>

356 <sup>21</sup> We calculated Tau across 53 tissues from the Genotype-Tissue Expression  
357 (GTEx) project, across six DLPFC cell types (astrocytes, endothelial cells,  
358 microglia, neurons, oligodendrocytes, and oligodendrocyte progenitor cells) from

Table 1. Number of Independent eQTL Modeled on Genomic Features

| Predictor                      | Model 1 Estimate | Model 1 Robust SE | Model 1 Pr(> z ) | Model 2 Estimate | Model 2 Robust SE | Model 2 Pr(> z ) | Model 3 Estimate | Model 3 Robust SE | Model 3 Pr(> z ) |
|--------------------------------|------------------|-------------------|------------------|------------------|-------------------|------------------|------------------|-------------------|------------------|
| log(Gene length)               | 0.27             | 0.04              | 5.16E-12         | 0.16             | 0.03              | 2.20E-06         | 0.17             | 0.03              | 9.87E-07         |
| LD blocks                      | 0.59             | 0.17              | 6.47E-04         | 0.33             | 0.15              | 2.92E-02         | 0.37             | 0.15              | 1.55E-02         |
| log(Gene length) : LD blocks   | -0.03            | 0.02              | 7.77E-02         | -0.01            | 0.01              | 5.65E-01         | -0.01            | 0.01              | 4.11E-01         |
| Constraint                     | -0.61            | 0.03              | 5.93E-85         | -0.20            | 0.03              | 2.93E-13         | -0.15            | 0.03              | 5.41E-08         |
| Cis-heritability               | -                | -                 | -                | 7.03             | 0.18              | 0.00             | 7.02             | 0.18              | 0.00             |
| Tau (tissue)                   | -                | -                 | -                | -                | -                 | -                | 0.08             | 0.08              | 2.76E-01         |
| Tau (DLPFC cell type)          | -                | -                 | -                | -                | -                 | -                | 0.20             | 0.09              | 3.69E-02         |
| Tau (developmental time point) | -                | -                 | -                | -                | -                 | -                | 0.17             | 0.09              | 5.99E-02         |

359 single cell RNA-seq<sup>23</sup>, and across eight developmental periods<sup>24</sup> (early prenatal,  
360 early mid-prenatal, late mid-prenatal, late prenatal, infant, child, adolescent, and  
361 adult) from the BrainSpan atlas DLPFC RNA-seq data. We confirmed that higher  
362 values of Tau reflect expression specificity, by comparing the distributions of all  
363 three Tau measures for all genes with the distributions for a subset of  
364 housekeeping genes<sup>34</sup> (**Figure S5**). We found positive correlations between  
365 eQTL number and tissue, cell type, and developmental specificities (Table 1,  
366 **Table S3, Figure S6**). The strongest correlation was with DLPFC cell type Tau,  
367 which is consistent with previous data demonstrating tissue specific, cell type  
368 dependent expression in blood;<sup>35</sup> however, we note that all three Tau sets were  
369 inter-correlated (**Table S3**).

370

### 371 **Epigenetic Enrichment Analyses**

372

373 One way in which eQTL may affect gene expression is through alteration of cis-  
374 regulatory elements such as promoters and enhancers. Putative causal eQTL  
375 variants have been shown to be enriched in genomic regions containing  
376 functional annotations such as DNase hypersensitive sites, transcription factor  
377 binding sites, promoters, and enhancers.<sup>36-39</sup> Our observation that conditional  
378 eQTL fall farther from transcription start sites than primary eQTL led us to  
379 hypothesize that primary eQTL may affect transcription levels by altering  
380 functional sites in promoters whereas conditional eQTL may do so by altering  
381 more distal regulatory elements such as enhancers. We therefore assessed

382 enrichment of primary and conditional eQTL in DLPFC and brain active promoter  
383 (TssA) and enhancer (merged Enh and EnhG) states derived from the NIH  
384 Roadmap Epigenomics Project,<sup>25; 26</sup> and in H3K4me3 and H3K27ac ChIP-seq  
385 peaks from a subset of the CMC post-mortem DLPFC samples. We performed  
386 logistic regression of SNP status (eQTL versus random matched SNP) on  
387 overlap with functional annotations, separately for each eQTL order (primary,  
388 secondary, tertiary, and greater than tertiary).

389

390 Both primary and conditional eQTL were significantly enriched in both promoter  
391 and enhancer chromatin states (Figure 3A-B, **Table S4**). Chromatin states from  
392 the DLPFC showed stronger eQTL enrichment than did the Brain annotation  
393 formed by merging all individual brain region chromatin states. We found that  
394 enrichments in both the DLPFC and Brain annotations generally decreased with  
395 higher conditional order of eQTL, particularly for the active promoter state. A  
396 similar pattern was observed when examining enrichment in neuronal nuclei  
397 (NeuN+) ChIP-seq peaks (Figure 3C), using the overlap of H3K4me3 and  
398 H3K27ac ChIP-seq peaks as a proxy for active promoters and H3K27ac peaks  
399 that do not overlap H3K4me3 peaks as a (relatively non-specific) proxy for  
400 enhancers.<sup>26</sup> These analyses showed decreasing enrichment in both promoters  
401 and enhancers with increasing eQTL order, with a more marked decrease in the  
402 promoters. Though there was also significant enrichment of eQTL in non-  
403 neuronal nuclei (NeuN-) ChIP-seq peaks, decreasing with higher eQTL order,  
404 this trend of a more marked decrease in active promoters was not observed in

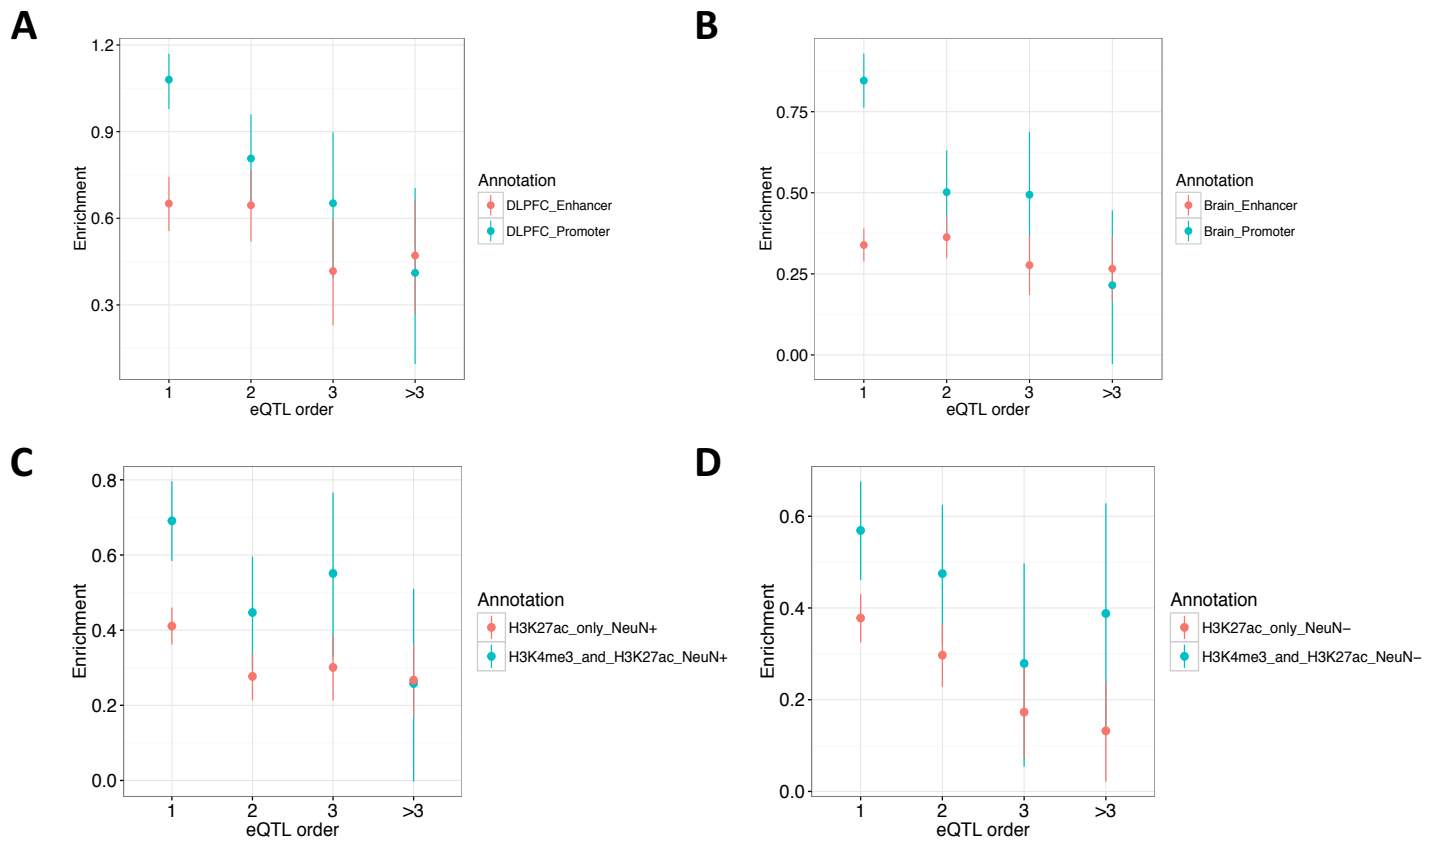

**Figure 3. Enrichments of Primary and Conditional eQTL in Active Regulatory Annotations**

Plotted are enrichments (estimate  $\pm$  95% CI from logistic regression, y-axes) of primary (x-axis eQTL order = 1) and conditional (eQTL order = 2, 3, >3) eQTL in functional annotations. Panels (A) and (B) show enrichment in DLPFC and Brain (union of all individual Brain regions) active promoter (turquoise) and enhancer (orange) ChromHMM states from the NIH Roadmap Epigenomics Project. Panel (C) shows enrichment in neuronal nuclei (NeuN+), for the intersection of H3K4me3 and H3K27ac ChIP-seq peaks (turquoise) and for H3K27 peaks that do not overlap H3K4me3 peaks (orange). Panel (D) shows enrichments in the same annotations, but for non-neuronal nuclei (NeuN-).

405 non-neuronal DLPFC nuclei (Figure 3D). Enrichment results for H3K4me3 and  
406 H3K27ac ChIP-seq peaks are shown in Figure S7.

407

#### 408 **eQTL Co-localization with SCZ GWAS**

409

410 We performed co-localization analyses in order to evaluate the extent of overlap  
411 between eQTL and GWAS signatures in schizophrenia, and to identify putative  
412 causal genes from GWAS associations. Considering 217 loci (**Table S5**) with  
413 lead SNPs reaching a significance threshold of  $P < 1 \times 10^{-6}$  from the recent  
414 Psychiatric Genomics Consortium schizophrenia GWAS,<sup>27</sup> we tabulated the  
415 number of eQTL ( $FDR \leq 5\%$ ) falling within GWAS loci. A total of 114 out of 217  
416 loci contained primary and/or conditional eQTL for 346 genes; 110 of these  
417 genes had one eQTL only, and 236 genes had more than one independent  
418 eQTL.

419

420 To quantitatively compare the SCZ GWAS and eQTL association signatures, we  
421 modified the R package COLOC<sup>29</sup> for Bayesian inference of co-localization  
422 between the two sets of summary statistics across each gene's cis-region.  
423 COLOC2, our modified implementation of COLOC, analyzes the hierarchical  
424 model of pw-GWAS,<sup>30</sup> with likelihood-based estimation of dataset-wide  
425 probabilities of five hypotheses ( $H_0$ , no association;  $H_1$ , GWAS association only;  
426  $H_2$ , eQTL association only;  $H_3$ , both but not co-localized; and  $H_4$ , both and co-  
427 localized). We then used these probabilities as priors to calculate empirical

428 Bayesian posterior probabilities for the five hypotheses for each locus, in  
429 particular  $PP_{H4}$  for co-localization.  
430  
431 For genes with conditional eQTL overlapping SCZ GWAS loci, summary  
432 statistics from “all-but-one” conditional eQTL analyses were assessed for co-  
433 localization with the GWAS signature (Figure 4). To illustrate this analytical  
434 strategy, we show eQTL results for the iron responsive element binding protein 2  
435 gene *IREB2* (*chr15:78729773-78793798*) as an example. Forward stepwise  
436 selection analysis identified two independent cis-eQTL for *IREB2*. In order to  
437 generate summary statistics for each eQTL in isolation, we conducted two “all-  
438 but-one” conditional analyses, in each analysis conditioning on all but a focal  
439 independent eQTL (for *IREB2* this entailed conditioning on only one eQTL per  
440 conditional analysis, but involved conditioning on up to six eQTL across genes in  
441 the SCZ co-localization analysis). We then tested for co-localization between the  
442 GWAS and all of the conditional summary statistics using COLOC2. In the case  
443 of *IREB2*, the conditional eQTL (rs7171869) was implicated as co-localized with  
444 the GWAS signal at this locus with a posterior probability for co-localization  $PP_{H4}$   
445 = 0.94. A qualitative examination of the *IREB2* locus supported the COLOC2  
446 results: the correlation between the GWAS P-values and conditional eQTL P-  
447 values was higher than that between the GWAS and primary eQTL P-values  
448 (Figure 5A). In addition, the GWAS signature for the locus more closely  
449 resembled the conditional eQTL signature than either the non-conditional eQTL  
450 signature or the primary eQTL signature (Figure 5B).

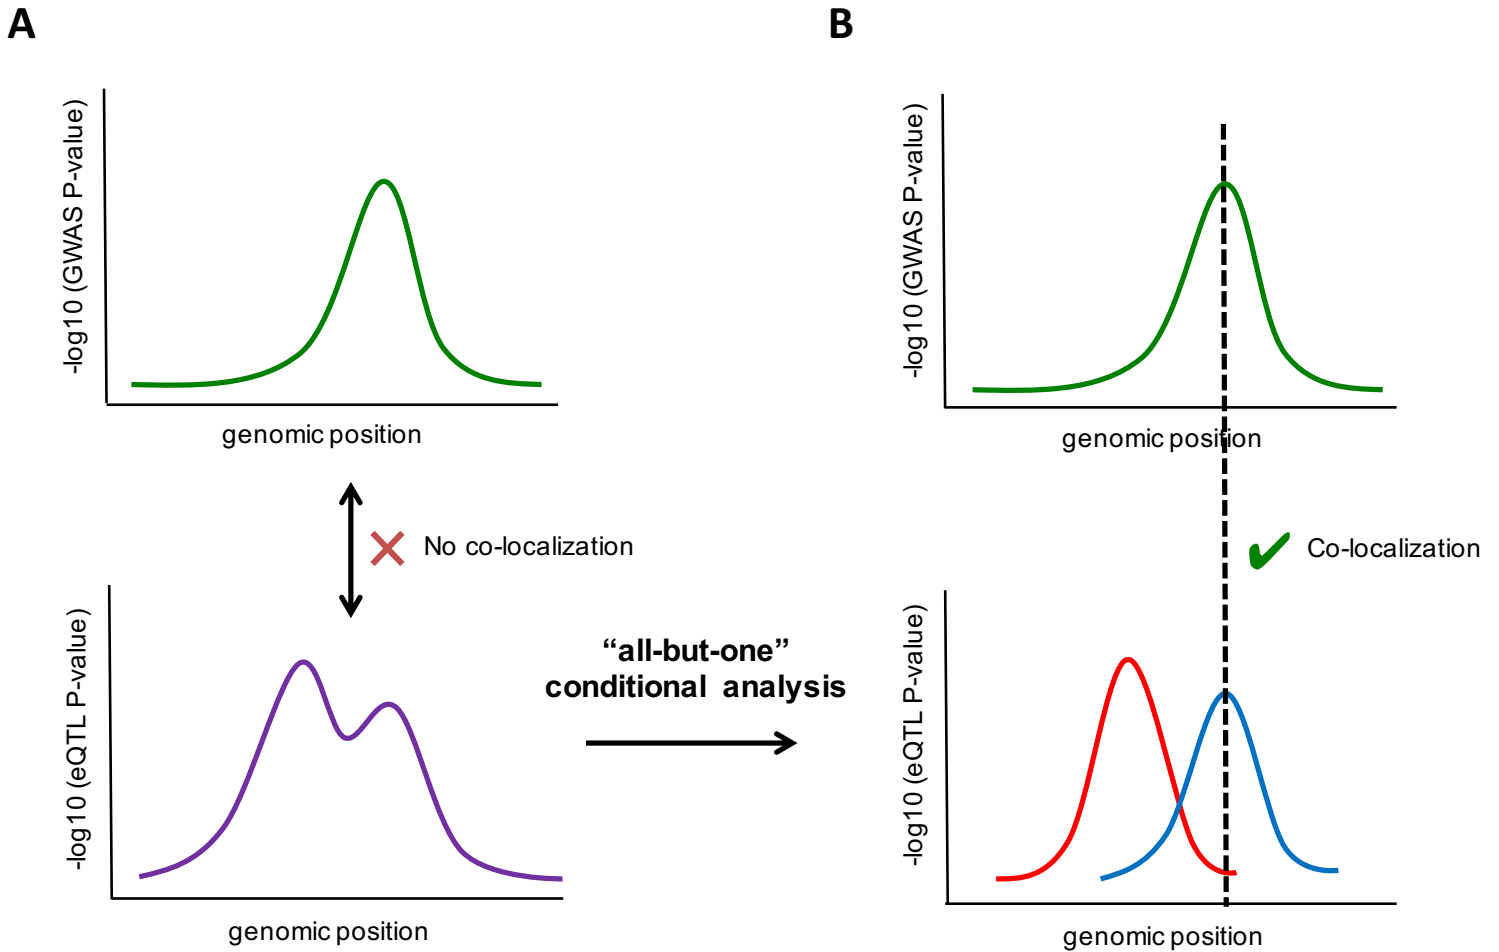

Figure 4. Conditional "All-but-One" Analysis to Isolate Independent eQTL Signatures

Panel (A) shows a hypothetical GWAS signature (top, green) at a given locus, and an overlapping hypothetical eQTL signature (bottom, purple), which comprises two independent eQTL. Panel (B) shows the same hypothetical GWAS and eQTL signatures after the "all-but-one" conditional eQTL analysis isolating the primary (red) and secondary (blue) eQTL signatures. Before conditional analysis there is a lack of co-localization between the GWAS signature and eQTL signature. After all-but-one conditional analysis, there is evidence for co-localization between the secondary eQTL and GWAS signatures.



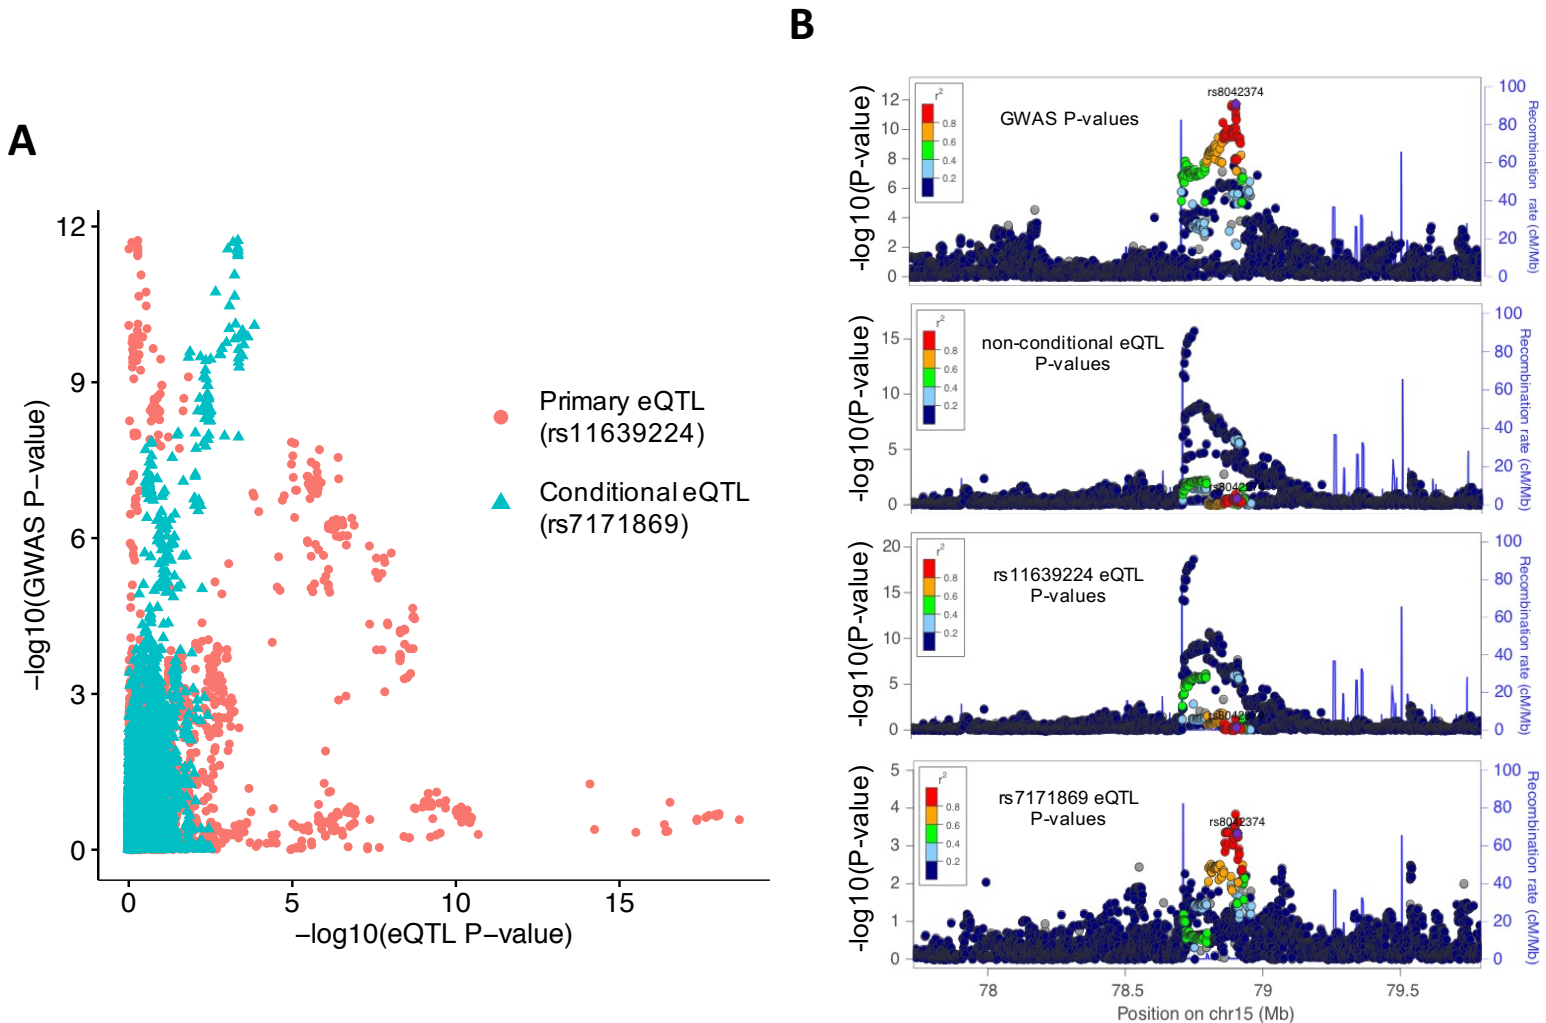

Figure 5. GWAS Signature for *IREB2* Co-localizes with the Conditional eQTL Signature

Panel (A) shows a P-P plot comparing  $-\log_{10}$  P-values from GWAS (y-axis) and “all-but-one” conditional eQTL analysis (x-axis), which shows the highest correlation between the GWAS and the conditional eQTL (rs7171869, turquoise triangles). Panel (B) shows LocusZoom plots for the *IREB2* locus, where the GWAS signal (top) more closely resembles the conditional eQTL signal (rs7171869, bottom) than the primary eQTL signal (rs11639224, third from top) or non-conditional eQTL signal (second from top). For all LocusZoom plots LD is colored with respect to the GWAS lead SNP (rs8042374, labelled).

451

452 We found that 40 loci contained genes with strong evidence of co-localization  
453 between eQTL and GWAS signatures, with posterior probability of  $H_4$  ( $PP_{H_4}$ )  $\geq$   
454 0.8 (Table 2, **Table S6**). When restricting to genome-wide significance for the  
455 GWAS, we found co-localization in 24 of the 108 loci. Given the correlations  
456 between number of independent eQTL and expression specificity scores (Tau)  
457 across tissues, cell types and development, we tabulated the reported genes'  
458 Tau percentiles and expression levels, to highlight contexts in which the genes  
459 are specifically expressed (Table 2, **Table S9**). We acknowledge that while  
460 posterior probability  $PP_{H_4} \geq 0.8$  demonstrates strong Bayesian evidence for co-  
461 localization, it is an arbitrary threshold for characterizing loci as SCZ-eQTL co-  
462 localized; we find that many loci with  $PP_{H_4} \geq 0.5$  appear qualitatively consistent  
463 with co-localization.

464

465 Importantly, for six of the 40 co-localizing loci, a conditional rather than primary  
466 eQTL co-localized with the GWAS with compelling qualitative support (Table 2,  
467 Figure 5, **Figures S8-S12**). The genes showing strong evidence for conditional  
468 eQTL co-localization include *SLC35E2*, *PROX1-AS1*, *PPM1M*, *SDAD1P1*,  
469 *STAT6*, and *IREB2*. Also notable are the occurrences of complex patterns of co-  
470 localization for some loci; for example, three loci showed evidence for co-  
471 localization with a primary eQTL for one gene and a conditional eQTL for  
472 another.

473

Table 2. GWAS-eQTL Co-localized Loci

| Chr | Range.left | Range.right | GWAS SNP   | GWAS P-value | eSNP        | eSNP P-value | primary/conditional | PP <sub>H4</sub> | Gene                  | Relevant tissue / cell type / develop. period (See Table S9) |
|-----|------------|-------------|------------|--------------|-------------|--------------|---------------------|------------------|-----------------------|--------------------------------------------------------------|
| 1   | 2372401    | 2402501     | rs4648845  | 4.033E-09    | rs12037821  | 6.4E-04      | conditional         | 0.87             | SLC35E2               | - / - / Early mid-prenatal                                   |
| 1   | 8355697    | 8638984     | rs301797   | 2.7E-09      | rs138050288 | 3.8E-05      | primary             | 0.95             | RERE                  | - / - / -                                                    |
| 1   | 30412551   | 30443951    | rs1498232  | 1.3E-09      | rs2015244   | 9.7E-12      | primary             | 0.99             | PTPRU                 | - / Neurons / Early mid-prenatal                             |
| 1   | 163582923  | 163766623   | rs7521492  | 5.6E-07      | rs10799961  | 2.4E-11      | primary             | 0.91             | PBX1                  | - / - / Early prenatal                                       |
| 1   | 205015255  | 205189455   | rs16937    | 8.7E-07      | rs12724651  | 5.3E-07      | primary             | 0.89             | TMEM81                | - / Neurons / -                                              |
|     |            |             |            |              | rs12031350  | 8.2E-06      | conditional         | 0.87             | RBBP5                 | - / - / -                                                    |
| 1   | 214137889  | 214163689   | rs7529073  | 9.7E-07      | rs1431983   | 1.7E-04      | conditional         | 0.93             | PROX1-AS1             | Cerebellar Hemisphere / Neurons / Adult                      |
| 2   | 73194203   | 73900439    | rs56145559 | 8.4E-08      | rs11679809  | 2.0E-37      | primary             | 0.86             | ALMS1P                | Testis / - / -                                               |
| 2   | 110262036  | 110398236   | rs9330316  | 7.7E-08      | rs892464    | 1.3E-28      | primary             | 0.92             | SEPT10                | - / - / Late prenatal                                        |
| 2   | 198148577  | 198835577   | rs6434928  | 1.5E-11      | rs12621129  | 2.2E-12      | primary             | 0.94             | SF3B1                 | - / - / -                                                    |
| 2   | 200715237  | 201247789   | rs281768   | 3.5E-14      | rs35220450  | 1.6E-10      | primary             | 0.95             | FTCDNL1, AC073043.2   | - / - / Adult                                                |
|     |            |             |            |              | rs186546506 | 8.8E-04      | conditional         | 0.83             | LINC01792, AC007163.3 | Putamen (basal ganglia) / - / Adult                          |
| 2   | 208371631  | 208531731   | rs2709410  | 4.1E-06      | rs34171849  | 2.2E-16      | primary             | 0.88             | METTL21A              | - / - / -                                                    |
|     |            |             |            |              | rs2551656   | 1.6E-09      | primary             | 0.86             | CREB1                 | - / - / Early prenatal                                       |
| 2   | 220033801  | 220071601   | rs6707588  | 9.5E-07      | rs11236     | 1.1E-09      | primary             | 0.92             | CNPPD1                | - / - / -                                                    |
| 3   | 36843183   | 36945783    | rs75968099 | 3.4E-12      | rs9834970   | 1.9E-05      | primary             | 0.94             | DCLK3                 | Nerve - Tibial / Neurons / Infant                            |
| 3   | 52281078   | 53539269    | rs2535627  | 3.956E-11    | rs6801235   | 2.8E-08      | conditional         | 0.86             | PPM1M                 | - / Neurons / Late prenatal                                  |
| 3   | 63792650   | 64004050    | rs832187   | 2.6E-08      | rs113386200 | 3.0E-12      | primary             | 0.98             | THOC7                 | - / - / -                                                    |
| 3   | 135807405  | 136615405   | rs7432375  | 5.3E-11      | rs10935184  | 7.7E-25      | primary             | 0.93             | PCCB                  | - / - / -                                                    |
| 4   | 170357552  | 170646052   | rs10520163 | 1.0E-08      | rs7438      | 1.5E-10      | primary             | 0.97             | CLCN3                 | - / - / -                                                    |
| 5   | 45291475   | 46404116    | rs1501357  | 1.2E-08      | rs9292918   | 4.5E-05      | primary             | 0.94             | BRCAT54, RP11-53019.1 | - / - / Adult                                                |
| 6   | 83779798   | 84407274    | rs3798869  | 1.2E-09      | rs2016358   | 8.7E-13      | primary             | 0.90             | SNAP91                | Cerebellar Hemisphere / - / -                                |
| 6   | 108875527  | 109019327   | rs9398171  | 3.4E-08      | rs111727905 | 3.8E-06      | primary             | 0.97             | ZNF259P1              | - / - / Early mid-prenatal                                   |

|    |           |           |            |           |            |         |             |      |                               |                                                     |
|----|-----------|-----------|------------|-----------|------------|---------|-------------|------|-------------------------------|-----------------------------------------------------|
| 7  | 21485312  | 21545712  | rs73060317 | 6.6E-07   | rs12672629 | 3.6E-05 | primary     | 0.92 | SP4                           | - / - / Early prenatal                              |
| 8  | 8088038   | 10056127  | rs2945232  | 2.0E-08   | rs2980441  | 1.9E-36 | primary     | 0.82 | FAM86B3P                      | - / - / Adolescence                                 |
| 8  | 26181524  | 26279124  | rs1042992  | 2.9E-07   | rs17055186 | 5.9E-25 | conditional | 0.91 | SDAD1P1                       | Testis / - / Adult                                  |
| 8  | 38020424  | 38310924  | rs57709857 | 2.3E-07   | rs17175814 | 2.1E-07 | primary     | 0.88 | WHSC1L1                       | - / - / Early prenatal                              |
| 8  | 144822546 | 144871746 | rs11784536 | 1.5E-05   | rs12541792 | 2.7E-37 | primary     | 0.90 | FAM83H                        | Esophagus - Mucosa / Oligodendrocytes / Adolescence |
| 9  | 26839508  | 26909408  | rs10967586 | 4.7E-07   | rs12345197 | 1.3E-06 | primary     | 0.80 | IFT74                         | - / - / -                                           |
| 11 | 46340213  | 46751213  | rs7951870  | 8.3E-11   | rs10160701 | 5.1E-05 | primary     | 0.88 | MDK                           | - / - / Early mid-prenatal                          |
| 12 | 57428314  | 57497814  | rs324017   | 2.1E-07   | rs4559     | 4.2E-08 | conditional | 0.91 | STAT6                         | - / Microglia / Adolescence                         |
| 14 | 35421614  | 35847614  | rs77477310 | 1.8E-07   | rs1028449  | 8.1E-04 | primary     | 0.84 | RP11-85K15.2                  | - / - / -                                           |
| 15 | 78803032  | 78926732  | rs8042374  | 1.865E-12 | rs7171869  | 1.4E-04 | conditional | 0.94 | IREB2                         | - / - / Early prenatal                              |
| 15 | 84661161  | 85153461  | rs12902973 | 8.4E-11   | rs35677834 | 1.6E-21 | primary     | 0.80 | LOC101929479,<br>RP11-561C5.3 | Ovary / - / Early mid-prenatal                      |
| 15 | 91416560  | 91436560  | rs4702     | 2.3E-12   | rs4702     | 9.3E-10 | primary     | 1.00 | FURIN                         | - / Endothelial cells / Adolescence                 |
| 16 | 4447751   | 4596451   | rs6500602  | 2.8E-07   | rs3747580  | 2.3E-16 | primary     | 0.90 | CORO7                         | - / - / -                                           |
|    |           |           |            |           | rs8046295  | 4.8E-15 | primary     | 0.89 | NMRAL1                        | - / - / -                                           |
| 16 | 29924377  | 30144877  | rs12691307 | 1.3E-10   | rs4788203  | 2.0E-05 | primary     | 0.88 | TMEM219                       | - / - / -                                           |
|    |           |           |            |           | rs3935873  | 7.5E-14 | primary     | 0.87 | INO80E                        | - / Neurons / -                                     |
|    |           |           |            |           | rs4787491  | 3.5E-05 | conditional | 0.82 | DOC2A                         | Brain - Cortex / Neurons / Adolescence              |
| 16 | 58669293  | 58691393  | rs12325245 | 1.1E-08   | rs11647976 | 4.8E-04 | primary     | 0.94 | CNOT1                         | - / - / -                                           |
| 17 | 17722402  | 18030202  | rs8082590  | 6.8E-09   | rs4072739  | 3.6E-15 | primary     | 0.92 | DRG2                          | - / - / -                                           |
| 19 | 11839736  | 11859736  | rs3095917  | 1.6E-06   | rs72986630 | 2.4E-07 | primary     | 1.00 | ZNF823                        | - / Endothelial cells / Early prenatal              |
| 19 | 19374022  | 19658022  | rs2905426  | 6.9E-09   | rs2965199  | 9.2E-36 | primary     | 0.87 | GATAD2A                       | - / - / -                                           |
| 19 | 50067499  | 50135399  | rs56873913 | 2.2E-07   | rs5023763  | 5.5E-05 | primary     | 0.93 | SNRNP70                       | - / - / -                                           |
| 22 | 41408556  | 42689414  | rs9607782  | 6.8E-12   | rs9607782  | 2.0E-04 | primary     | 0.96 | RANGAP1                       | - / - / -                                           |

## 474 **Comparison with Previous Co-localization Analyses**

475

476 In our prior analyses<sup>14</sup> we reported a co-localization analysis of the 108 genome-  
477 wide significant schizophrenia GWAS loci and non-conditional eQTL using  
478 Sherlock.<sup>40</sup> Those results and our current findings are highly concordant (**Table**  
479 **S7**). Eleven loci were reported as co-localized in both analyses. Thirteen loci  
480 were co-localized ( $PP_{H4} \geq 0.8$ ) in our analysis but not previously, twelve of which  
481 showed suggestive significance in Sherlock ( $P < 2 \times 10^{-4}$ ), or in one case involved a  
482 conditional eQTL (*SLC35E2*) in our analysis. Six loci were co-localized in the  
483 previous study but not in the current analysis; three of these resulted from  
484 differences in study design such as GWAS locus definition and eQTL overlap  
485 criteria, and two were suggestive in the current analysis ( $0.65 < PP_{H4} < 0.8$ ). The  
486 one remaining discrepant locus (*chr8:143302933-143403527*) was found to co-  
487 localize with *TSNARE1* eQTL previously (Sherlock  $P = 8.24 \times 10^{-7}$ ), but not here  
488 (COLOC2 primary eQTL  $PP_{H4} = 0.074$ ,  $PP_{H3} = 0.93$ ), and indeed a qualitative  
489 comparison of the eQTL and GWAS data did not appear to support co-  
490 localization (**Figure S13**).

491

492 In the present analysis we considered not only primary but also conditional eQTL  
493 association signals for co-localization with the GWAS, allowing us to detect loci  
494 where co-localization may be obscured by multiple association signals in non-  
495 conditional eQTL analysis. We also compared our conditional co-localization  
496 results with results using non-conditional eQTL analysis, using the same

497 COLOC2 method and SCZ GWAS loci (**Table S8**). Conditional and non-  
498 conditional COLOC2 results were highly concordant, with slightly higher  $PP_{H4S}$   
499 resulting from the same WABFs because of a higher prior probability of co-  
500 localization estimated in the non-conditional COLOC2 analysis. Thirty-five loci  
501 were co-localized in both analyses, and five loci that were co-localized in the  
502 non-conditional analysis only were all highly suggestive in the conditional  
503 analysis ( $0.65 < PP_{H4} < 0.8$ ). The five loci that were co-localized only in the  
504 conditional COLOC2 analysis involved conditional and not primary eQTL.

505

## 506 DISCUSSION

507

508 We utilized genotype and expression data from 467 human post-mortem brain  
509 samples from the DLPFC to conduct eQTL mapping analyses, to characterize  
510 both primary and conditionally independent eQTL. We then identified co-  
511 localization between SCZ GWAS and our eQTL association signals, including  
512 conditional eQTL. Our principal findings include four major observations. First,  
513 we detect that conditional eQTL are widespread in the brain tissue samples we  
514 investigated. In 63% of genes with at least one eQTL, we found multiple  
515 statistically independent eQTL (8,136 genes). This demonstrates that genetic  
516 variation affecting RNA abundance is incompletely characterized by focusing  
517 only on one primary eQTL per gene, which is the case currently for most eQTL  
518 studies. We suggest that these conditional eQTL may represent regulatory

519 variation specific to biological contexts not necessarily well represented in the  
520 transcriptomic data at hand.

521

522 Second, we find the genomics of conditional eQTL and their genes are consistent  
523 with complex, context-specific regulation of gene expression. Conditional eQTL  
524 occur farther from transcription start sites than primary eQTL, consistent with  
525 effects on distal regulatory elements. Genes with more independent eQTL tend  
526 to be larger and span multiple recombination hotspot intervals, and tend to be  
527 less constrained at the protein level. While these associations may reflect in part  
528 greater power to detect independent eQTL that are not in linkage disequilibrium  
529 and that have greater phenotypic variance, they are also consistent with more  
530 complex regulation and greater potential for regulatory genetic variation. The  
531 strong association of eQTL number with gene expression cis-SNP-heritability  
532 shows that conditional eQTL contribute to regulatory genetic variation.

533 Importantly, associations with specificity of expression across tissues,  
534 developmental periods, and cell types determined from single-cell RNA  
535 sequencing data, suggest that context specificity plays a role in the occurrence of  
536 multiple statistically independent eQTL. Cell type specificity is particularly  
537 strongly correlated with eQTL number, consistent with those cell types being  
538 present in the current tissue-homogenate data.

539

540 Both primary and conditional eQTL are enriched in both active promoter and  
541 enhancer regions, and their enrichment in active promoters diminishes with

542 increasing conditional eQTL order. In other words, conditional eQTL show  
543 greater enrichment in enhancers relative to promoters than do primary eQTL. We  
544 note that these enrichment analyses are less well powered for conditional eQTL  
545 than for primary eQTL, both because of smaller effect sizes of conditional eQTL,  
546 and because of statistical error introduced by forward stepwise conditional  
547 analyses.<sup>41-43</sup>

548

549 Third, we highlight the importance of examining conditional eQTL for co-  
550 localization with GWAS. In at least six out of 40 loci showing GWAS-eQTL co-  
551 localization, a conditional eQTL signal co-localizes with SCZ risk. If we had  
552 considered only primary eQTL in the analyses, these instances of co-localization  
553 would have been missed. Conditional eQTL that co-localize with disease risk  
554 may reflect regulatory mechanisms that are important in a key developmental  
555 period or individual cell type, and may be missed when focusing on primary  
556 eQTL discovered in adult whole tissue. As further efforts are made to generate  
557 data across ranges of tissues or individual cell-types, we may have a better  
558 ability to directly identify regulatory variants specific to these contexts. However if  
559 a variant is primarily active in a very specific time point or stimulus condition,  
560 capturing data reflecting this condition will remain challenging. Conditional co-  
561 localization analysis in well-powered eQTL cohorts may best identify the genes  
562 driving these trait associations, though further validation work will be required to  
563 understand the mechanism by which the gene contributes to disease risk.

564



565 Fourth, we have identified a number of candidate genes for which genetic  
566 variation for expression co-localizes with genetic variation for schizophrenia risk  
567 (Table 2), including cases of co-localization with conditional eQTL. Genetic co-  
568 localization is expected if gene expression causally mediates disease risk,  
569 although we recognize that co-localization could also result from pleiotropy or  
570 linkage, particularly in regions of extensive linkage disequilibrium and haplotype  
571 structure.<sup>44; 45</sup> Our analyses prioritize 24 genes among the 111 genes within 23  
572 genome-wide significant SCZ loci (GWAS  $P < 5 \times 10^{-8}$ ), and 22 genes in 17  
573 suggestive ( $P < 1 \times 10^{-6}$ ) loci. Among the candidates are genes that have  
574 previously been implicated in SCZ etiology, such as *FURIN*,<sup>14</sup> as well as  
575 alternative candidates in well-known SCZ loci – *DCLK3* in the *TRANK1* locus,<sup>46</sup>  
576 *PPM1M* in the *ITIH1* locus,<sup>47</sup> *IREB2* in the *CHRNA3* locus,<sup>27</sup> and *GATAD2A* in  
577 the *NCAN* locus.<sup>27</sup> Our candidates include several genes not previously  
578 considered as candidates,<sup>27</sup> in some cases - *SLC35E2*, *PTPRU*, *LINC01792*,  
579 *DCLK3*, *PPM1M*, *LOC101929479* - because the genes themselves do not  
580 overlap the GWAS locus regions but their eQTL do. We also find several non-  
581 coding RNA genes - *PROX1-AS1*, *FTCDNL1*, *LINC01792*, *BRCAT54*.

582

583 In an effort to highlight specific developmental periods or cell types for follow-up,  
584 we have tabulated expression specificity in GTEx tissues, brain sample cell types  
585 from single-cell RNA-seq,<sup>23</sup> and in BrainSpan DLPFC developmental periods, for  
586 all identified genes (Table 2, **Table S9**). Their expression contexts show a  
587 diversity of patterns, and can provide clues to generate specific hypotheses for

588 functional follow-up of their potential roles in SCZ. Among DLPFC cell types, we  
589 find several genes that are specific to neurons and examples of genes specific to  
590 oligodendrocytes or endothelial cells (Table 2). Among DLPFC developmental  
591 periods, we see diverse expression patterns ranging from early prenatal and  
592 broader prenatal, to perinatal (late prenatal and infancy periods), to  
593 adolescent/adult expression. We note no clear pattern of correlation between cell  
594 type and developmental expression patterns, for example neuronal cell type  
595 expressed genes include genes with prenatal, perinatal and postnatal  
596 expression. Interestingly, however, all genes broadly expressed across cell types  
597 show prenatal expression (**Table S9**).

598

599 *IREB2* (iron regulatory element binding protein 2), highlighted in our analyses as  
600 a conditional eQTL hit, is a key regulator of iron homeostasis<sup>48; 49</sup> and has been  
601 implicated in neurodegenerative disorders.<sup>50; 51</sup> Mouse *IREB2* homolog Irf2  
602 knockouts exhibit impairments in coordination and balance, exploration, and  
603 nociception.<sup>49</sup> The *IREB2* locus includes the *CHRNA3-CHRNA5-CHRNA4*  
604 nicotinic receptor cluster associated with schizophrenia<sup>27</sup> as well as nicotine  
605 dependence and smoking behavior,<sup>52</sup> lung cancer,<sup>53; 54</sup> and COPD.<sup>55</sup> We note  
606 that the *IREB2* conditional eQTL is associated with *CHRNA3* and *CHRNA5*  
607 expression in cerebellum, caudate and some non-brain tissues in GTEx, but both  
608 genes are too lowly expressed for eQTL analysis in the CMC DLPFC samples.  
609 Therefore, we cannot rule out the possibility that other genes may be causal of  
610 SCZ risk at this locus, perhaps in other brain regions.

611

612 A conditional eQTL for *STAT6* co-localizes with a suggestive SCZ GWAS signal  
613 ( $P=2 \times 10^{-7}$ ).<sup>27</sup> The immune related transcription factor *STAT6* induces interleukin  
614 4 (IL4)-mediated anti-apoptotic activity of T helper cells, and the locus is  
615 associated with migraine<sup>56; 57</sup> and brain glioma,<sup>58</sup> as well as several  
616 immune/inflammatory diseases.<sup>59-61</sup> *STAT6* also activates neuronal  
617 progenitor/stem cells and neurogenesis,<sup>62</sup> making it intriguing as an immune-  
618 related SCZ candidate given recent observations about the role of complement  
619 factor 4 (*C4*) gene as a SCZ risk gene,<sup>63</sup> and prior work potentially implicating  
620 microglia.<sup>64</sup> Consistent with a role in immune-mediated synaptic pruning, *STAT6*  
621 expression is broadly postnatal and specific to microglia and neurons (**Table S9**).

622

623 Finally, a conditional eQTL for PROX1 Antisense RNA 1 (*PROX1-AS1*; *chr1*,  
624 *214Mb*) co-localizes with a suggestive SCZ locus ( $P=9.7 \times 10^{-7}$ ). The Prospero  
625 Homeobox 1 (*PROX1*) transcription factor, involved in development and cell  
626 differentiation in several tissues, including oligodendrocytes<sup>65</sup> and GABAergic  
627 interneurons<sup>66</sup> in the brain. This lncRNA has been implicated as aberrantly  
628 expressed in several cancers, is upregulated in the cell cycle S-phase, and  
629 promotes G1/S transition in cell culture.<sup>67</sup> Like *STAT6*, *PROX1-AS1* expression is  
630 specific to neurons and mature oligodendrocytes, and is expressed postnatally  
631 (**Table S9**).

632

633 In conclusion, we find that conditional eQTL are wide spread, and are consistent  
634 with complex and context specific regulation. Accounting for conditional eQTL  
635 leads to new findings of GWAS-eQTL co-localization, and generates specific  
636 hypotheses for gene expression possibly mediating disease risk.

637

## 638 ACKNOWLEDGMENTS

639

640 Data were generated as part of the CommonMind Consortium supported by  
641 funding from Takeda Pharmaceuticals Company Limited, F. Hoffman-La Roche  
642 Ltd and NIH grants R01MH085542, R01MH093725, P50MH066392,  
643 P50MH080405, R01MH097276, RO1-MH-075916, P50M096891,  
644 P50MH084053S1, R37MH057881 and R37MH057881S1,  
645 HHSN271201300031C, AG02219, AG05138 and MH06692. Brain tissue for the  
646 study was obtained from the following brain bank collections: the Mount Sinai  
647 NIH Brain and Tissue Repository, the University of Pennsylvania Alzheimer's  
648 Disease Core Center, the University of Pittsburgh NeuroBioBank and Brain and  
649 Tissue Repositories and the NIMH Human Brain Collection Core. CMC  
650 Leadership: Pamela Sklar, Joseph Buxbaum (Icahn School of Medicine at Mount  
651 Sinai), Bernie Devlin, David Lewis (University of Pittsburgh), Raquel Gur, Chang-  
652 Gyu Hahn (University of Pennsylvania), Keisuke Hirai, Hiroyoshi Toyoshiba  
653 (Takeda Pharmaceuticals Company Limited), Enrico Domenici, Laurent Essioux  
654 (F. Hoffman-La Roche Ltd), Lara Mangravite, Mette Peters (Sage Bionetworks),  
655 Thomas Lehner, Barbara Lipska (NIMH). ROSMAP study data were provided by

656 the Rush Alzheimer's Disease Center, Rush University Medical Center, Chicago.  
657 Data collection was supported through funding by NIA grants P30AG10161,  
658 R01AG15819, R01AG17917, R01AG30146, R01AG36836, U01AG32984,  
659 U01AG46152, the Illinois Department of Public Health, and the Translational  
660 Genomics Research Institute. The Genotype-Tissue Expression (GTEx) Project  
661 was supported by the [Common Fund](#) of the Office of the Director of the National  
662 Institutes of Health, and by NCI, NHGRI, NHLBI, NIDA, NIMH, and NINDS. The  
663 data used for the analyses described in this manuscript were obtained from  
664 the [GTEx Portal](#) on 09/05/16. BrainSpan: Atlas of the Developing Human Brain  
665 [Internet]. Funded by ARRA Awards 1RC2MH089921-01, 1RC2MH090047-01,  
666 and 1RC2MH089929-01.

667

#### 668 WEB RESOURCES

669

670 AMP-AD Knowledge Portal, (<https://www.synapse.org/ampad>)

671 BrainSpan atlas, <http://www.brainspan.org/>

672 CommonMind Consortium data, <http://www.synapse.org/CMC>

673 CommonMind Consortium ChIP-seq data,

674 <https://www.synapse.org/#!/Synapse:syn8040458>

675 [COLOC2](https://github.com/Stahl-Lab-MSSM/coloc2), <https://github.com/Stahl-Lab-MSSM/coloc2>

676 Darmanis et. al. single-cell RNA-seq data, <https://www.ncbi.nlm.nih.gov/geo/>,

677 accession number GSE67835

678 ExAC Functional Gene Constraint, <http://exac.broadinstitute.org/downloads>

679 [GCTA, http://cnsgenomics.com/software/gcta/](http://cnsgenomics.com/software/gcta/)  
680 [GemTools, http://www.wpic.pitt.edu/wpiccomp/gen/GemTools/GemTools.htm](http://www.wpic.pitt.edu/wpiccomp/gen/GemTools/GemTools.htm)  
681 GTEx Portal, <https://gtexportal.org/home/>  
682 [HBCC microarray cohort, dbGaP \(ID:](#)  
683 [phs000979.v1.p1\)](https://www.ncbi.nlm.nih.gov/gap), <https://www.ncbi.nlm.nih.gov/gap>  
684 LDetect LD blocks, <https://bitbucket.org/nygcresearch/ldetect-data/overview>  
685 NIH Roadmap Epigenomics Project chromatin state learning,  
686 [http://egg2.wustl.edu/roadmap/web\\_portal/chr\\_state\\_learning.html#core\\_15state](http://egg2.wustl.edu/roadmap/web_portal/chr_state_learning.html#core_15state)  
687 R language and environment, <https://www.r-project.org/>  
688 SNPsnap, <https://data.broadinstitute.org/mpg/snpsnap/>

689

## 690 REFERENCES

691

- 692 1. Gilad, Y., Rifkin, S.A., and Pritchard, J.K. (2008). Revealing the architecture of gene  
693 regulation: the promise of eQTL studies. *Trends in genetics : TIG* 24, 408-415.
- 694 2. Cookson, W., Liang, L., Abecasis, G., Moffatt, M., and Lathrop, M. (2009). Mapping  
695 complex disease traits with global gene expression. *Nature reviews Genetics*  
696 10, 184-194.
- 697 3. Montgomery, S.B., and Dermitzakis, E.T. (2011). From expression QTLs to  
698 personalized transcriptomics. *Nature reviews Genetics* 12, 277-282.
- 699 4. Albert, F.W., and Kruglyak, L. (2015). The role of regulatory variation in complex  
700 traits and disease. *Nature reviews Genetics* 16, 197-212.
- 701 5. Moffatt, M.F., Kabesch, M., Liang, L., Dixon, A.L., Strachan, D., Heath, S., Depner, M.,  
702 von Berg, A., Bufe, A., Rietschel, E., et al. (2007). Genetic variants regulating  
703 ORMDL3 expression contribute to the risk of childhood asthma. *Nature* 448,  
704 470-473.
- 705 6. Speliotes, E.K., Willer, C.J., Berndt, S.I., Monda, K.L., Thorleifsson, G., Jackson, A.U.,  
706 Lango Allen, H., Lindgren, C.M., Luan, J., Magi, R., et al. (2010). Association  
707 analyses of 249,796 individuals reveal 18 new loci associated with body  
708 mass index. *Nature genetics* 42, 937-948.
- 709 7. Dubois, P.C., Trynka, G., Franke, L., Hunt, K.A., Romanos, J., Curtotti, A.,  
710 Zhernakova, A., Heap, G.A., Adany, R., Aromaa, A., et al. (2010). Multiple  
711 common variants for celiac disease influencing immune gene expression.  
712 *Nature genetics* 42, 295-302.

- 713 8. Libioulle, C., Louis, E., Hansoul, S., Sandor, C., Farnir, F., Franchimont, D., Vermeire,  
714 S., Dewit, O., de Vos, M., Dixon, A., et al. (2007). Novel Crohn disease locus  
715 identified by genome-wide association maps to a gene desert on 5p13.1 and  
716 modulates expression of PTGER4. *PLoS genetics* 3, e58.
- 717 9. Aguet, F., Brown, A.A., Castel, S., Davis, J.R., Mohammadi, P., Segre, A.V., Zappala, A.,  
718 Abell, N.S., Fresard, L., and Gamazon, E.R. (2016). Local genetic effects on  
719 gene expression across 44 human tissues. In. (bioRxiv).
- 720 10. Jansen, R., Hottenga, J.J., Nivard, M.G., Abdellaoui, A., Laport, B., de Geus, E.J.,  
721 Wright, F.A., Penninx, B.W., and Boomsma, D.I. (2017). Conditional eQTL  
722 Analysis Reveals Allelic Heterogeneity of Gene Expression. *Human molecular*  
723 *genetics* Epub ahead of print.
- 724 11. Zeng, B., Lloyd-Jones, L., Holloway, A., Marigorta, U.M., Metspalu, A., Montgomery,  
725 G.W., Esko, T., Brigham, K.L., Quyyumi, A.A., Idaghdour, Y., et al. (2016).  
726 Constraints on eQTL fine mapping in the presence of multi-site local  
727 regulation of gene expression. In. (bioRxiv).
- 728 12. Dimas, A.S., Deutsch, S., Stranger, B.E., Montgomery, S.B., Borel, C., Attar-Cohen,  
729 H., Ingle, C., Beazley, C., Gutierrez Arcelus, M., Sekowska, M., et al. (2009).  
730 Common regulatory variation impacts gene expression in a cell type-  
731 dependent manner. *Science* 325, 1246-1250.
- 732 13. Liu, X., Finucane, H.K., Gusev, A., Bhatia, G., Gazal, S., O'Connor, L., Bulik-Sullivan,  
733 B., Wright, F.A., Sullivan, P.F., Neale, B.M., et al. (2017). Functional  
734 Architectures of Local and Distal Regulation of Gene Expression in Multiple  
735 Human Tissues. *American journal of human genetics* Epub ahead of print.
- 736 14. Fromer, M., Roussos, P., Sieberts, S.K., Johnson, J.S., Kavanagh, D.H., Perumal,  
737 T.M., Ruderfer, D.M., Oh, E.C., Topol, A., Shah, H.R., et al. (2016). Gene  
738 expression elucidates functional impact of polygenic risk for schizophrenia.  
739 *Nature neuroscience* 19, 1442-1453.
- 740 15. Shabalin, A.A. (2012). Matrix eQTL: ultra fast eQTL analysis via large matrix  
741 operations. *Bioinformatics* 28, 1353-1358.
- 742 16. De Jager, P.L., Srivastava, G., Lunnon, K., Burgess, J., Schalkwyk, L.C., Yu, L., Eaton,  
743 M.L., Keenan, B.T., Ernst, J., McCabe, C., et al. (2014). Alzheimer's disease:  
744 early alterations in brain DNA methylation at ANK1, BIN1, RHBDF2 and other  
745 loci. *Nature neuroscience* 17, 1156-1163.
- 746 17. McCarthy, S., Das, S., Kretzschmar, W., Delaneau, O., Wood, A.R., Teumer, A., Kang,  
747 H.M., Fuchsberger, C., Danecek, P., Sharp, K., et al. (2016). A reference panel of  
748 64,976 haplotypes for genotype imputation. *Nature genetics* 48, 1279-1283.
- 749 18. Das, S., Forer, L., Schonherr, S., Sidore, C., Locke, A.E., Kwong, A., Vrieze, S.I.,  
750 Chew, E.Y., Levy, S., McGue, M., et al. (2016). Next-generation genotype  
751 imputation service and methods. *Nature genetics* 48, 1284-1287.
- 752 19. Yang, J., Lee, S.H., Goddard, M.E., and Visscher, P.M. (2011). GCTA: a tool for  
753 genome-wide complex trait analysis. *American journal of human genetics* 88,  
754 76-82.
- 755 20. Yanai, I., Benjamin, H., Shmoish, M., Chalifa-Caspi, V., Shklar, M., Ophir, R., Bar-  
756 Even, A., Horn-Saban, S., Safran, M., Domany, E., et al. (2005). Genome-wide  
757 midrange transcription profiles reveal expression level relationships in  
758 human tissue specification. *Bioinformatics* 21, 650-659.

- 759 21. Kryuchkova-Mostacci, N., and Robinson-Rechavi, M. (2016). A benchmark of  
760 gene expression tissue-specificity metrics. *Briefings in bioinformatics* 18,  
761 205-214.
- 762 22. Consortium, G. (2013). The Genotype-Tissue Expression (GTEx) project. *Nature*  
763 *genetics* 45, 580-585.
- 764 23. Darmanis, S., Sloan, S.A., Zhang, Y., Enge, M., Caneda, C., Shuer, L.M., Hayden  
765 Gephart, M.G., Barres, B.A., and Quake, S.R. (2015). A survey of human brain  
766 transcriptome diversity at the single cell level. *Proc Natl Acad Sci U S A* 112,  
767 7285-7290.
- 768 24. Lin, G.N., Corominas, R., Lemmens, I., Yang, X., Tavernier, J., Hill, D.E., Vidal, M.,  
769 Sebat, J., and Iakoucheva, L.M. (2015). Spatiotemporal 16p11.2 protein  
770 network implicates cortical late mid-fetal brain development and KCTD13-  
771 Cul3-RhoA pathway in psychiatric diseases. *Neuron* 85, 742-754.
- 772 25. Roadmap Epigenomics, C., Kundaje, A., Meuleman, W., Ernst, J., Bilenky, M., Yen,  
773 A., Heravi-Moussavi, A., Kheradpour, P., Zhang, Z., Wang, J., et al. (2015).  
774 Integrative analysis of 111 reference human epigenomes. *Nature* 518, 317-  
775 330.
- 776 26. Ernst, J., and Kellis, M. (2012). ChromHMM: automating chromatin-state  
777 discovery and characterization. *Nat Methods* 9, 215-216.
- 778 27. Schizophrenia Working Group of the Psychiatric Genomics, C. (2014). Biological  
779 insights from 108 schizophrenia-associated genetic loci. *Nature* 511, 421-  
780 427.
- 781 28. Pruim, R.J., Welch, R.P., Sanna, S., Teslovich, T.M., Chines, P.S., Gliedt, T.P.,  
782 Boehnke, M., Abecasis, G.R., and Willer, C.J. (2010). LocusZoom: regional  
783 visualization of genome-wide association scan results. *Bioinformatics* 26,  
784 2336-2337.
- 785 29. Giambartolomei, C., Vukcevic, D., Schadt, E.E., Franke, L., Hingorani, A.D., Wallace,  
786 C., and Plagnol, V. (2014). Bayesian test for colocalisation between pairs of  
787 genetic association studies using summary statistics. *PLoS genetics* 10,  
788 e1004383.
- 789 30. Pickrell, J.K., Berisa, T., Liu, J.Z., Segurel, L., Tung, J.Y., and Hinds, D.A. (2016).  
790 Detection and interpretation of shared genetic influences on 42 human traits.  
791 *Nature genetics* 48, 709-717.
- 792 31. Wakefield, J. (2009). Bayes factors for genome-wide association studies:  
793 comparison with P-values. *Genet Epidemiol* 33, 79-86.
- 794 32. Berisa, T., and Pickrell, J.K. (2016). Approximately independent linkage  
795 disequilibrium blocks in human populations. *Bioinformatics* 32, 283-285.
- 796 33. Lek, M., Karczewski, K.J., Minikel, E.V., Samocha, K.E., Banks, E., Fennell, T.,  
797 O'Donnell-Luria, A.H., Ware, J.S., Hill, A.J., Cummings, B.B., et al. (2016).  
798 Analysis of protein-coding genetic variation in 60,706 humans. *Nature* 536,  
799 285-291.
- 800 34. Eisenberg, E., and Levanon, E.Y. (2013). Human housekeeping genes, revisited.  
801 *Trends in genetics : TIG* 29, 569-574.
- 802 35. Zhernakova, D.V., Deelen, P., Vermaat, M., van Itersson, M., van Galen, M.,  
803 Arindrarto, W., van 't Hof, P., Mei, H., van Dijk, F., Westra, H.J., et al. (2017).



804 Identification of context-dependent expression quantitative trait loci in  
805 whole blood. *Nature genetics* 49, 139-145.

806 36. Farh, K.K., Marson, A., Zhu, J., Kleinewietfeld, M., Housley, W.J., Beik, S., Shores,  
807 N., Whitton, H., Ryan, R.J., Shishkin, A.A., et al. (2015). Genetic and epigenetic  
808 fine mapping of causal autoimmune disease variants. *Nature* 518, 337-343.

809 37. Tak, Y.G., and Farnham, P.J. (2015). Making sense of GWAS: using epigenomics  
810 and genome engineering to understand the functional relevance of SNPs in  
811 non-coding regions of the human genome. *Epigenetics Chromatin* 8, 57.

812 38. Brown, C.D., Mangravite, L.M., and Engelhardt, B.E. (2013). Integrative modeling  
813 of eQTLs and cis-regulatory elements suggests mechanisms underlying cell  
814 type specificity of eQTLs. *PLoS genetics* 9, e1003649.

815 39. Gaffney, D.J., Veyrieras, J.B., Degner, J.F., Pique-Regi, R., Pai, A.A., Crawford, G.E.,  
816 Stephens, M., Gilad, Y., and Pritchard, J.K. (2012). Dissecting the regulatory  
817 architecture of gene expression QTLs. *Genome Biol* 13, R7.

818 40. He, X., Fuller, C.K., Song, Y., Meng, Q., Zhang, B., Yang, X., and Li, H. (2013).  
819 Sherlock: detecting gene-disease associations by matching patterns of  
820 expression QTL and GWAS. *American journal of human genetics* 92, 667-680.

821 41. Servin, B., and Stephens, M. (2007). Imputation-based analysis of association  
822 studies: candidate regions and quantitative traits. *PLoS genetics* 3, e114.

823 42. Spain, S.L., and Barrett, J.C. (2015). Strategies for fine-mapping complex traits.  
824 *Human molecular genetics* 24, R111-119.

825 43. Hormozdiari, F., Kostem, E., Kang, E.Y., Pasaniuc, B., and Eskin, E. (2014).  
826 Identifying causal variants at loci with multiple signals of association.  
827 *Genetics* 198, 497-508.

828 44. Guo, H., Fortune, M.D., Burren, O.S., Schofield, E., Todd, J.A., and Wallace, C.  
829 (2015). Integration of disease association and eQTL data using a Bayesian  
830 colocalisation approach highlights six candidate causal genes in immune-  
831 mediated diseases. *Human molecular genetics* 24, 3305-3313.

832 45. Zhu, Z., Zhang, F., Hu, H., Bakshi, A., Robinson, M.R., Powell, J.E., Montgomery,  
833 G.W., Goddard, M.E., Wray, N.R., Visscher, P.M., et al. (2016). Integration of  
834 summary data from GWAS and eQTL studies predicts complex trait gene  
835 targets. *Nature genetics* 48, 481-487.

836 46. Schizophrenia Psychiatric Genome-Wide Association Study, C. (2011). Genome-  
837 wide association study identifies five new schizophrenia loci. *Nature genetics*  
838 43, 969-976.

839 47. Sleiman, P., Wang, D., Glessner, J., Hadley, D., Gur, R.E., Cohen, N., Li, Q.,  
840 Hakonarson, H., and Janssen, C.N.G.W.G. (2013). GWAS meta analysis  
841 identifies TSNARE1 as a novel Schizophrenia / Bipolar susceptibility locus.  
842 *Scientific reports* 3, 3075.

843 48. Kim, W.J., and Lee, S.D. (2015). Candidate genes for COPD: current evidence and  
844 research. *International journal of chronic obstructive pulmonary disease* 10,  
845 2249-2255.

846 49. Zumbrennen-Bullough, K.B., Becker, L., Garrett, L., Holter, S.M., Calzada-Wack, J.,  
847 Mossbrugger, I., Quintanilla-Fend, L., Racz, I., Rathkolb, B., Klopstock, T., et al.  
848 (2014). Abnormal brain iron metabolism in *Irp2* deficient mice is associated  
849 with mild neurological and behavioral impairments. *PloS one* 9, e98072.

- 850 50. Dusek, P., Jankovic, J., and Le, W. (2012). Iron dysregulation in movement  
851 disorders. *Neurobiol Dis* 46, 1-18.
- 852 51. Rouault, T.A. (2013). Iron metabolism in the CNS: implications for  
853 neurodegenerative diseases. *Nat Rev Neurosci* 14, 551-564.
- 854 52. Thorgeirsson, T.E., Geller, F., Sulem, P., Rafnar, T., Wiste, A., Magnusson, K.P.,  
855 Manolescu, A., Thorleifsson, G., Stefansson, H., Ingason, A., et al. (2008). A  
856 variant associated with nicotine dependence, lung cancer and peripheral  
857 arterial disease. *Nature* 452, 638-642.
- 858 53. Amos, C.I., Wu, X., Broderick, P., Gorlov, I.P., Gu, J., Eisen, T., Dong, Q., Zhang, Q.,  
859 Gu, X., Vijayakrishnan, J., et al. (2008). Genome-wide association scan of tag  
860 SNPs identifies a susceptibility locus for lung cancer at 15q25.1. *Nature*  
861 *genetics* 40, 616-622.
- 862 54. Hung, R.J., McKay, J.D., Gaborieau, V., Boffetta, P., Hashibe, M., Zaridze, D.,  
863 Mukeria, A., Szeszenia-Dabrowska, N., Lissowska, J., Rudnai, P., et al. (2008).  
864 A susceptibility locus for lung cancer maps to nicotinic acetylcholine receptor  
865 subunit genes on 15q25. *Nature* 452, 633-637.
- 866 55. DeMeo, D.L., Mariani, T., Bhattacharya, S., Srisuma, S., Lange, C., Litonjua, A.,  
867 Bueno, R., Pillai, S.G., Lomas, D.A., Sparrow, D., et al. (2009). Integration of  
868 genomic and genetic approaches implicates IREB2 as a COPD susceptibility  
869 gene. *American journal of human genetics* 85, 493-502.
- 870 56. Anttila, V., Winsvold, B.S., Gormley, P., Kurth, T., Bettella, F., McMahon, G., Kallela,  
871 M., Malik, R., de Vries, B., Terwindt, G., et al. (2013). Genome-wide meta-  
872 analysis identifies new susceptibility loci for migraine. *Nature genetics* 45,  
873 912-917.
- 874 57. Gormley, P., Anttila, V., Winsvold, B.S., Palta, P., Esko, T., Pers, T.H., Farh, K.H.,  
875 Cuenca-Leon, E., Muona, M., Furlotte, N.A., et al. (2016). Meta-analysis of  
876 375,000 individuals identifies 38 susceptibility loci for migraine. *Nature*  
877 *genetics* 48, 856-866.
- 878 58. Ruan, Z., Zhao, Y., Yan, L., Chen, H., Fan, W., Chen, J., Wu, Q., Qian, J., Zhang, T.,  
879 Zhou, K., et al. (2011). Single nucleotide polymorphisms in IL-4Ra, IL-13 and  
880 STAT6 genes occurs in brain glioma. *Front Biosci (Elite Ed)* 3, 33-45.
- 881 59. Sleiman, P.M., Wang, M.L., Cianferoni, A., Aceves, S., Gonsalves, N., Nadeau, K.,  
882 Bredenoord, A.J., Furuta, G.T., Spergel, J.M., and Hakonarson, H. (2014). GWAS  
883 identifies four novel eosinophilic esophagitis loci. *Nat Commun* 5, 5593.
- 884 60. Granada, M., Wilk, J.B., Tuzova, M., Strachan, D.P., Weidinger, S., Albrecht, E.,  
885 Gieger, C., Heinrich, J., Himes, B.E., Hunninghake, G.M., et al. (2012). A  
886 genome-wide association study of plasma total IgE concentrations in the  
887 Framingham Heart Study. *J Allergy Clin Immunol* 129, 840-845 e821.
- 888 61. Bonnelykke, K., Matheson, M.C., Pers, T.H., Granel, R., Strachan, D.P., Alves, A.C.,  
889 Linneberg, A., Curtin, J.A., Warrington, N.M., Standl, M., et al. (2013). Meta-  
890 analysis of genome-wide association studies identifies ten loci influencing  
891 allergic sensitization. *Nature genetics* 45, 902-906.
- 892 62. Bhattarai, P., Thomas, A.K., Cosacak, M.I., Papadimitriou, C., Mashkaryan, V., Froc,  
893 C., Reinhardt, S., Kurth, T., Dahl, A., Zhang, Y., et al. (2016). IL4/STAT6  
894 Signaling Activates Neural Stem Cell Proliferation and Neurogenesis upon  
895 Amyloid-beta42 Aggregation in Adult Zebrafish Brain. *Cell Rep* 17, 941-948.

- 896 63. Sekar, A., Bialas, A.R., de Rivera, H., Davis, A., Hammond, T.R., Kamitaki, N.,  
897 Tooley, K., Presumey, J., Baum, M., Van Doren, V., et al. (2016). Schizophrenia  
898 risk from complex variation of complement component 4. *Nature* 530, 177-  
899 183.
- 900 64. Schafer, D.P., Lehrman, E.K., Kautzman, A.G., Koyama, R., Mardinly, A.R.,  
901 Yamasaki, R., Ransohoff, R.M., Greenberg, M.E., Barres, B.A., and Stevens, B.  
902 (2012). Microglia sculpt postnatal neural circuits in an activity and  
903 complement-dependent manner. *Neuron* 74, 691-705.
- 904 65. Kato, K., Konno, D., Berry, M., Matsuzaki, F., Logan, A., and Hidalgo, A. (2015).  
905 Prox1 Inhibits Proliferation and Is Required for Differentiation of the  
906 Oligodendrocyte Cell Lineage in the Mouse. *PloS one* 10, e0145334.
- 907 66. Miyoshi, G., Young, A., Petros, T., Karayannis, T., McKenzie Chang, M., Lavado, A.,  
908 Iwano, T., Nakajima, M., Taniguchi, H., Huang, Z.J., et al. (2015). Prox1  
909 Regulates the Subtype-Specific Development of Caudal Ganglionic Eminence-  
910 Derived GABAergic Cortical Interneurons. *J Neurosci* 35, 12869-12889.
- 911 67. Yang, F., Yi, F., Zheng, Z., Ling, Z., Ding, J., Guo, J., Mao, W., Wang, X., Wang, X., Ding,  
912 X., et al. (2012). Characterization of a carcinogenesis-associated long non-  
913 coding RNA. *RNA Biol* 9, 110-116.
- 914
- 915
